# Supplementary material
Source: publisher site journal article supplement (https://www.dovepress.com/get_supplementary_file.php?f=437609.docx)
Supplement: Supplementary file 1 [file get_supplementary_file.php]

**Supplementary Table 1. 43 Patient’s conditions at baseline.**

| **Patient no.** | **Age**  **(years)/sex** | **Follow-up duration, (months)** | **Underlying disease** | **Pain Side** | **Duration of pain prior to injection(months)** | **Number of treatments** | **Medications** | **BNI Score on admission** |
| --- | --- | --- | --- | --- | --- | --- | --- | --- |
| 1 | 59/F | 37 | HT | Right | 7 | 2 | OXC | IV |
| 2 | 52/F | 142 |  | Left | 12 | 1 | CBZ, M | IIIb |
| 3 | 54/F | 136 |  | Right | 8 | 2 | CBZ, PGB, GBP | IV |
| 4 | 57/F | 122 | HT | Right | 6 | 1 | CBZ | IV |
| 5 | 67/F | 119 | DM | Right | 15 | 3 | GBP | IIIb |
| 6 | 61/F | 99 | DM, HT | Left | 13 | 2 | CBZ, M, PGB | IV |
| 7 | 72/F | 52 |  | Left | 4 | 1 | OXC | Ⅲa |
| 8 | 73/F | 49 | f | Right | 2 | 3 | OXC | IV |
| 9 | 53/F | 99 |  | Left | 2 | 2 | M, GBP | Ⅲa |
| 10 | 73/F | 98 |  | Left | 4 | 3 | OXC, M, PGB | IIIb |
| 11 | 53/F | 83 | DM, HT | Right | 24 | 2 | CBZ | IV |
| 12 | 68/F | 60 |  | Right | 15 | 4 | OXC | IIIb |
| 13 | 52/F | 77 |  | Right | 11 | 1 | OXC, DUL, Oxy, PGB, GBP | V |
| 14 | 70/F | 47 | HT | Left | 22 | 3 | CBZ, M | IIIb |
| 15 | 62/F | 59 |  | Right | 10 | 2 | GBP | Ⅲa |
| 16 | 38/F | 69 |  | Right | 8 | 1 | CBZ | IIIb |
| 17 | 55/F | 68 |  | Right | 7 | 2 | CBZ, M, MO, GBP | V |
| 18 | 71/F | 54 | HT | Right | 6 | 2 | CBZ | IIIb |
| 19 | 58/F | 13 |  | Left | 38 | 1 | CBZ | IV |
| 20 | 67/F | 3 |  | Right | 55 | 3 | CBZ M | IIIb |
| 21 | 45/M | 144 |  | Right | 16 | 3 | CBZ, M, Oxy, PGB, GBP | V |
| 22 | 41/M | 122 |  | Left | 3 | 2 | CBZ, OXC | IIIb |
| 23 | 43/M | 130 |  | Right | 15 | 3 | OXC | IV |
| 24 | 46/M | 136 |  | Left | 8 | 1 | CBZ | Ⅲa |
| 25 | 56/M | 129 |  | Right | 19 | 2 | CBZ, OXC | IV |
| 26 | 43/M | 131 |  | Left | 42 | 2 | OXC | V |
| 27 | 54/M | 123 |  | Right | 48 | 2 | CBZ, DUL, Oxy, GBP | V |
| 28 | 51/M | 87 |  | Left | 37 | 4 | M | IIIb |
| 29 | 56/M | 22 | HT | Left | 31 | 6 | CBZ | Ⅲa |
| 30 | 74/M | 37 | COPD | Right | 33 | 2 | OXC, MO, PGB | V |
| 31 | 58/M | 112 |  | Left | 29 | 4 | OXC | IIIb |
| 32 | 58/M | 83 | HT | Right | 14 | 1 | CBZ, M, DUL, MO, GBP | IV |
| 33 | 73/M | 80 | DM | Left | 5 | 1 | CBZ, M, GBP | IV |
| 34 | 84/M | 77 | HT, CHD | Left | 2 | 1 | CBZ, Oxy | V |
| 35 | 51/M | 34 |  | Left | 3 | 1 | CBZ, M | V |
| 36 | 59/M | 58 | LC | Left | 18 | 1 | CBZ | IIIb |
| 37 | 63/M | 48 | HT | Left | 25 | 2 | CBZ, M, GBP | V |
| 38 | 71/M | 48 |  | Left | 30 | 2 | CBZ M | IV |
| 39 | 51/M | 39 |  | Right | 25 | 4 | CBZ | Ⅲa |
| 40 | 74/M | 37 |  | Left | 5 | 2 | CBZ | IV |
| 41 | 62/M | 26 |  | Right | 9 | 5 | CBZ | IV |
| 42 | 63/M | 15 | HT | Left | 11 | 8 | CBZ, PGB, GBP | IV |
| 43 | 51/M | 5 |  | Left | 1 | 7 | OXC | IV |

Abbreviations: F: female; M: male; BNI: barrow neurological institute; DM: diabetes mellitus; HT: hypertension; CHD: coronary heart disease; LC: Liver cirrhosis; COPD: chronic obstructive pulmonary disease; CBZ: Carbamazepine OXC: oxcarbazepine; M: tramadol; DUL: Duloxetine; Oxy: oxycodone; MO: morphant; PGB: Pregabalin; GBP: gabapentin.

**Supplementary Table 2. 43 Patient’s conditions after UGPNB treatment.**

| **Patient no.** | **BNI Score at discharge** | **Adverse event** | **results at discharge** | **follow-up results (month)** |
| --- | --- | --- | --- | --- |
| 1 | V | o | ineffective |  |
| 2 | Ⅰ |  | Recovered |  |
| 3 | II |  | Improved |  |
| 4 | II |  | Improved |  |
| 5 | Ⅰ |  | Recovered |  |
| 6 | IIIb |  | Improved | relapse (4) |
| 7 | Ⅰ |  | Recovered |  |
| 8 | II |  | Improved |  |
| 9 | II |  | Improved | relapse (45) |
| 10 | Ⅰ | o | Recovered |  |
| 11 | II |  | Improved | relapse (36) |
| 12 | Ⅲa | o+p | Improved | relapse (1) |
| 13 | II |  | Improved | relapse (96) |
| 14 | II |  | Improved | relapse (15) |
| 15 | II |  | Improved | relapse (0.5) |
| 16 | IIIa |  | Improved |  |
| 17 | Ⅰ |  | Recovered |  |
| 18 | Ⅰ |  | Recovered |  |
| 19 | Ⅲa |  | Improved |  |
| 20 | IIIb | p | ineffective |  |
| 21 | IIIb | p | Improved |  |
| 22 | Ⅲa |  | Improved |  |
| 23 | IIIb |  | Improved |  |
| 24 | Ⅲa |  | ineffective |  |
| 25 | Ⅰ |  | Recovered |  |
| 26 | Ⅲa | o | Improved | relapse (3) |
| 27 | V |  | ineffective |  |
| 28 | IV | o | ineffective |  |
| 29 | Ⅰ |  | Recovered |  |
| 30 | V |  | ineffective |  |
| 31 | Ⅲa |  | Improved | relapse (3) |
| 32 | IIIb |  | Improved | relapse (0.8) |
| 33 | Ⅰ |  | Recovered |  |
| 34 | Ⅰ |  | Recovered | relapse (63) |
| 35 | V |  | ineffective |  |
| 36 | Ⅲa |  | Improved |  |
| 37 | V |  | ineffective |  |
| 38 | Ⅰ |  | Recovered |  |
| 39 | II |  | Improved | relapse (1) |
| 40 | Ⅰ |  | Recovered |  |
| 41 | IIIb |  | Improved | relapse (12) |
| 42 | Ⅰ |  | Recovered |  |
| 43 | Ⅲa |  | Improved |  |

Abbreviations: UGPNB: ultrasound-guided glossopharyngeal nerve block; BNI: barrow neurological institute; o: temporary hoarseness; p: difficulty with drinking and swallowing.

**Supplementary Table 3. 43 Patient’s BNI scores at various time points.**

| **Patient no.** | **BNI Score on admission** | **BNI Score**  **at discharge** | **BNI Score**  **at the first follow-up visit (month)** | **BNI Score**  **at the second follow-up visit (month)** | **BNI Score**  **at the third follow-up visit (month)** | **BNI Score**  **at the fourth follow-up visit (month)** | **BNI Score**  **at the fifth follow-up visit (month)** | **BNI Score**  **at the sixth follow-up visit (month)** | **BNI Score**  **at the seventh follow-up visit (month)** | **BNI Score**  **at the eighth follow-up visit (month)** | **BNI Score**  **at the ninth follow-up visit (month)** | **BNI Score**  **at the tenth follow-up visit (month)** | **BNI Score**  **at the eleventh follow-up visit (month)** | **BNI Score**  **at the twelfth follow-up visit (month)** |
| --- | --- | --- | --- | --- | --- | --- | --- | --- | --- | --- | --- | --- | --- | --- |
| 1 | IV | V | ⅠA (12) | Ⅰ (24) | Ⅰ (37) |  |  |  |  |  |  |  |  |  |
| 2 | IIIb | Ⅰ | Ⅰ (12) | Ⅰ (24) | Ⅰ (36) | Ⅰ (48) | Ⅰ (60) | Ⅰ (72) | Ⅰ (84) | Ⅰ (96) | Ⅰ (108) | Ⅰ (120) | Ⅰ (132) | Ⅰ (142) |
| 3 | IV | II | II (12) | II (24) | II (36) | II (48) | I (60) | II (72) | II (84) | II (96) | I (108) | II (120) | II (132) | II (136) |
| 4 | IV | II | II (12) | II (24) | II (36) | I (48) | II (60) | II (72) | Ⅰ (84) | II (96) | II (108) | II (120) | II (122) |  |
| 5 | IIIb | Ⅰ | Ⅰ (12) | Ⅰ (24) | Ⅰ (36) | Ⅰ (48) | Ⅰ (60) | Ⅰ (72) | Ⅰ (84) | Ⅰ (96) | Ⅰ (108) | Ⅰ (119) |  |  |
| 6 | IV | IIIb | IV (4) | IV (24) | IV (36) | IV (48) | IV (60) | IV (72) | IV (84) | IV (96) | IV (99) |  |  |  |
| 7 | Ⅲa | Ⅰ | Ⅰ (12) | Ⅰ (24) | Ⅰ (36) | Ⅰ (48) | Ⅰ (52) |  |  |  |  |  |  |  |
| 8 | IV | II | II (12) | II (24) | II (36) | II (48) | II (49) |  |  |  |  |  |  |  |
| 9 | Ⅲa | II | II (12) | II (24) | II (36) | Ⅲa (45) | IID (51) | II (72) | II (84) | II (96) | II (99) |  |  |  |
| 10 | IIIb | Ⅰ | Ⅰ (12) | Ⅰ (24) | Ⅰ (36) | Ⅰ (48) | Ⅰ (60) | Ⅰ (72) | Ⅰ (84) | Ⅰ (96) | Ⅰ (98) |  |  |  |
| 11 | IV | II | II (12) | II (24) | IV (36) | I (39) | I (60) | I (72) | I (83) |  |  |  |  |  |
| 12 | IIIb | Ⅲa | Ⅲb (1) | Ⅲb (24) | Ⅲb (36) | Ⅲb (48) | Ⅲb (60) |  |  |  |  |  |  |  |
| 13 | V | II | II (12) | II (24) | II (36) | II (48) | II (60) | II (72) | Ⅲa (84) | V (96) | V (77) |  |  |  |
| 14 | IIIb | II | II (12) | IIIb (15) | IIIb (36) | IIIb (47) |  |  |  |  |  |  |  |  |
| 15 | Ⅲa | II | Ⅲa (0.5) | Ⅲa (24) | Ⅲa (36) | Ⅲa (48) | Ⅲa (59) |  |  |  |  |  |  |  |
| 16 | IIIb | IIIa | Ⅲa (12) | Ⅲa (24) | Ⅲa (36) | Ⅲa (48) | Ⅲa (60) | Ⅲa (69) |  |  |  |  |  |  |
| 17 | V | Ⅰ | Ⅰ (12) | Ⅰ (24) | Ⅰ (36) | Ⅰ (48) | Ⅰ (60) | Ⅰ (68) |  |  |  |  |  |  |
| 18 | IIIb | Ⅰ | Ⅰ (12) | Ⅰ (24) | Ⅰ (36) | Ⅰ (48) | Ⅰ (54) |  |  |  |  |  |  |  |
| 19 | IV | Ⅲa | Ⅲa (12) | Ⅲa (13) |  |  |  |  |  |  |  |  |  |  |
| 20 | IIIb | IIIb | ⅠA (12) |  |  |  |  |  |  |  |  |  |  |  |
| 21 | V | IIIb | IIIb (12) | IIIb (24) | IIIb (36) | IIIb (48) | IIIb (60) | IIIb (72) | IIIb (84) | IIIb (96) | IIIb (108) | IIIb (120) | IIIb (132) | IIIb (144) |
| 22 | IIIb | Ⅲa | IIIa (12) | IIIa (24) | IIIa (36) | IIIa (48) | IIIa (60) | IIIa (72) | IIIa (84) | IIIa (96) | IIIa (108) | IIIa (120) | IIIa (122) |  |
| 23 | IV | IIIb | IIIb (12) | IIIb (24) | IIIb (36) | IIIb (48) | IIIb (60) | IIIb (72) | IIIb (84) | IIIb (96) | IIIb (108) | IIIb (120) | IIIb (130) |  |
| 24 | Ⅲa | Ⅲa | Ⅲa (12) | ⅠA (24) | Ⅰ (36) | Ⅰ (48) | Ⅰ (60) | II (72) | Ⅰ (84) | Ⅰ (96) | Ⅰ (108) | Ⅰ (120) | Ⅰ (132) | Ⅰ (136) |
| 25 | IV | Ⅰ | Ⅰ (12) | Ⅰ (24) | Ⅰ (36) | Ⅰ (48) | Ⅰ (60) | Ⅰ (72) | Ⅰ (84) | Ⅰ (96) | Ⅰ (108) | II (120) | Ⅰ (129) |  |
| 26 | V | Ⅲa | V (3) | IID (15) | II (36) | II (48) | II (60) | II (72) | II (84) | II (96) | II (108) | II (120) | II (131) |  |
| 27 | V | V | V (12) | ⅠA(24) | Ⅰ (36) | Ⅰ (48) | Ⅰ (60) | Ⅰ (72) | Ⅰ (84) | Ⅰ (96) | Ⅰ (108) | Ⅰ (120) | Ⅰ (123) |  |
| 28 | IIIb | IV | IIB (12) | Ⅰ (24) | Ⅰ(36) | Ⅰ (48) | Ⅰ (60) | II (72) | Ⅰ (84) | Ⅰ(87) |  |  |  |  |
| 29 | Ⅲa | Ⅰ | Ⅰ (12) | Ⅰ (22) |  |  |  |  |  |  |  |  |  |  |
| 30 | V | V | ⅠA (12) | Ⅰ (24) | Ⅰ (36) | Ⅰ (37) |  |  |  |  |  |  |  |  |
| 31 | IIIb | Ⅲa | IIIb (3) | IIIb (24) | IIIb (36) | IIIb (48) | IIIb (60) | IIIb (72) | IIIb (84) | IIIb (96) | IIIb (108) | IIIb (112) |  |  |
| 32 | IV | IIIb | IV (0.8) | IV (24) | IV (36) | IV (48) | IV (60) | IV (72) | IV (83) |  |  |  |  |  |
| 33 | IV | Ⅰ | Ⅰ (12) | Ⅰ (24) | Ⅰ (36) | II (48) | Ⅰ (60) | Ⅰ (72) | Ⅰ (80) |  |  |  |  |  |
| 34 | V | Ⅰ | Ⅰ (12) | Ⅰ (24) | Ⅰ (36) | Ⅰ (48) | Ⅰ (60) | V (63) | V (77) |  |  |  |  |  |
| 35 | V | V | ⅠC (12) | Ⅰ (24) | Ⅰ (34) |  |  |  |  |  |  |  |  |  |
| 36 | IIIb | Ⅲa | IIIa (12) | IIIa (24) | IIIa (36) | IIIa (48) | IIIa (58) |  |  |  |  |  |  |  |
| 37 | V | V | IIA (12) | II (24) | II (36) | II (48) |  |  |  |  |  |  |  |  |
| 38 | IV | Ⅰ | Ⅰ (12) | Ⅰ (24) | II (36) | Ⅰ (48) |  |  |  |  |  |  |  |  |
| 39 | Ⅲa | II | IIIa (1) | IIIa (24) | IIIa (36) | IID (39) |  |  |  |  |  |  |  |  |
| 40 | IV | Ⅰ | Ⅰ (12) | Ⅰ (24) | Ⅰ (36) | Ⅰ (37) |  |  |  |  |  |  |  |  |
| 41 | IV | IIIb | IV (12) | IV (24) | IV (26) |  |  |  |  |  |  |  |  |  |
| 42 | IV | Ⅰ | Ⅰ (12) | Ⅰ (15) |  |  |  |  |  |  |  |  |  |  |
| 43 | IV | Ⅲa | IIIa (5) |  |  |  |  |  |  |  |  |  |  |  |

Abbreviations: A: After discharge, the patient underwent MVD surgery; B: After discharge, take oral Chinese medicine treatment; C: After discharge, received acupuncture; D: Selected second UGPNB treatment.
